# Supplementary material
Source: ML conference proceedings conference paper supplement (https://proceedings.mlr.press/v80/nguyen18d.html)
Supplement: Supplementary file [file nguyen18d-supp.pdf]

---

## Active Testing: Supplementary Materials

---

Phuc Nguyen<sup>1</sup> Deva Ramanan<sup>2</sup> Charless Fowlkes<sup>1</sup>

### 1. Expected Precision and Average Precision

Let Precision and Recall at K be defined as

$$P_k = \frac{1}{k} \sum_{i \leq k} z_i \quad (1)$$

and,

$$R_k = \frac{1}{N_p} \sum_{i \leq k} z_i \quad (2)$$

where  $N_p$  is the number of positive instances in the whole set. The average precision is given by integrating precision with respect to recall:

$$\begin{aligned} AP &= \sum_k (R_k - R_{k-1}) P_k \\ &= \sum_k \left( \frac{1}{N_p} z_k \right) P_k \\ &= \sum_k \left( \frac{1}{N_p} z_k \right) \left( \frac{1}{k} \sum_{i \leq k} z_i \right) \\ &= \frac{1}{N_p} \sum_k \frac{z_k}{k} \sum_{i \leq k} z_i \end{aligned} \quad (3)$$

We would like to compute expectations when some  $z_i$  are unobserved. For notational convenience, let  $p_i = P(z_i = 1 | \mathcal{O})$  when  $z_i$  is unobserved and  $\tilde{z}_i$  be the observed value when the ground-truth associated with example  $i$  is vetted.

<sup>1</sup>University of California, Irvine <sup>2</sup>Carnegie Mellon University. Correspondence to: Phuc Nguyen <nguyenpx@uci.edu>.

We can then compute expected  $Prec@K$  as:

$$\begin{aligned} E[Prec@K] &= \frac{1}{K} \sum_{i \leq K} E[z_i] \\ &= \frac{1}{K} \left( \sum_{i \leq K, i \in V} \tilde{z}_i + \sum_{i \leq K, i \in U} p_i \right) \end{aligned} \quad (4)$$

And the expected change for this metric is given by:

$$\begin{aligned} E_{p(z_i|V)} [\Delta_i(z_i)] &= p_i \frac{1}{K} |1 - p_i| + (1 - p_i) \frac{1}{K} |0 - p_i| \\ &= \frac{2}{K} p_i (1 - p_i) \end{aligned} \quad (5)$$

where we write  $p_i = p(z_i = 1 | \mathcal{O})$ .

Expected AP is more interesting because it includes products of the  $z_i$ .

$$\begin{aligned} E[AP] &= \frac{1}{N_p} \sum_k \frac{1}{k} E[z_k \sum_{i \leq k} z_i] \\ &= \frac{1}{N_p} \sum_k \frac{1}{k} \sum_{i \leq k} E[z_k z_i] \end{aligned}$$

We note that in our application of evaluating instance segmentation, the quantity  $N_p$  is known prior to vetting. In other settings, it may also be a random variable that depends on the vetting outcomes. In the following derivation, we temporarily drop the constant  $\frac{1}{N_p}$  to reduce notational clutter.

Assuming independence of  $z_i$  and  $z_k$ , we have:

$$\begin{aligned} E[z_i] &= p_i \\ E[z_i z_k] &= p_i p_k \end{aligned}$$

Expanding the vetted and unvetted terms we can compute:

$$\begin{aligned} E[AP] &= \sum_k \frac{1}{k} \sum_{i \leq k} E[z_k z_i] \\ &= \sum_{k \in V} \frac{1}{k} \left( \sum_{i \leq k, i \in V} z_k z_i \right) + \sum_{k \in V} \frac{1}{k} \left( \sum_{i \leq k, i \in U} z_k p_i \right) \\ &\quad + \sum_{k \in U} \frac{1}{k} \left( \sum_{i \leq k, i \in V} p_k z_i \right) + \sum_{k \in U} \frac{1}{k} \left( \sum_{i \leq k, i \in U} p_k p_i \right) \end{aligned}$$

which can be written a bit more compactly as:

$$E[AP] = \left( \sum_{k \in V} \left( \frac{z_k}{k} E[\text{Prec}@k] \right) + \sum_{k \in U} \left( \frac{p_k}{k} E[\text{Prec}@k] \right) \right)$$

We would like to compute the change in  $E[AP]$  when we vet some example. Before vetting sample  $j$ , we have:

$$\begin{aligned} E[AP] &= \sum_{k \in V} \frac{1}{k} \left[ \sum_{i \leq k, i \in V} z_k z_i \right] \\ &+ \sum_{k \in V} \frac{1}{k} \left[ \sum_{i \leq k, i \in U \setminus j} z_k p_i + z_k p_j \delta[j \leq k] \right] \\ &+ \sum_{k \in U \setminus j} \frac{1}{k} \left[ \sum_{i \leq k, i \in V} p_k z_i \right] + \frac{1}{j} \left[ \sum_{i \leq j, i \in V} p_j z_i \right] \\ &+ \sum_{k \in U \setminus j} \frac{1}{k} \left[ \sum_{i \leq k, i \in U \setminus j} p_k p_i + p_k p_j \delta[j \leq k] \right] \\ &+ \frac{1}{j} \left[ \sum_{i \in U \setminus j, i \leq j} p_j p_i + p_j p_j \right] \end{aligned}$$

After vetting the example  $j$ , we have:

$$\begin{aligned} E[AP|z_j] &= \sum_{k \in V} \frac{1}{k} \sum_{i \leq k, i \in V} z_k z_i \\ &+ \sum_{k \in V} \frac{1}{k} \left[ \sum_{i \leq k, i \in U \setminus j} z_k p_i + z_k z_j \delta[j \leq k] \right] \\ &+ \sum_{k \in U \setminus j} \frac{1}{k} \left[ \sum_{i \leq k, i \in V} p_k z_i \right] + \frac{1}{j} \left[ \sum_{i \leq j, i \in V} z_j z_i \right] \\ &+ \sum_{k \in U \setminus j} \frac{1}{k} \left[ \sum_{i \leq k, i \in U \setminus j} p_k p_i + p_k z_j \delta[j \leq k] \right] \\ &+ \frac{1}{j} \left[ \sum_{i \leq j, i \in U \setminus j} z_j p_i + z_j z_j \right] \end{aligned}$$

The difference between these estimates is,

$$\begin{aligned} \Delta(z_j) &= E[AP|z_j] - E[AP] \\ &= \sum_{k \in V} \frac{1}{k} z_k (z_j - p_j) \delta[j \leq k] + \\ &\quad \frac{1}{j} \sum_{i \leq j, i \in V} (z_j - p_j) z_i + \\ &\quad \sum_{k \in U \setminus j} \frac{1}{k} [p_k (z_j - p_j) \delta[j \leq k]] + \\ &\quad \frac{1}{j} \left[ \sum_{i \leq j, i \in U \setminus j} (z_j p_i + z_j z_j - p_j p_i - p_j p_j) \right] \end{aligned}$$

The expected reduction given our estimator for  $z_j$  is

$$E[\Delta] = p_j \Delta(z_j = 1) + (1 - p_j) \Delta(z_j = 0)$$

where:

$$\begin{aligned} \Delta(z_j = 0) &= \sum_{k \in V} \frac{1}{k} z_k (-p_j) \delta[j \leq k] + \\ &\quad \frac{1}{j} \sum_{i \leq j, i \in V} (-p_j) z_i + \\ &\quad \sum_{k \in U \setminus j} \frac{1}{k} p_k (-p_j) \delta[j \leq k] + \\ &\quad \frac{1}{j} \left[ \sum_{i \leq j, i \in U \setminus j} (-p_j p_i - p_j p_j) \right] \end{aligned}$$

$$\begin{aligned} \Delta(z_j = 1) &= \sum_{k \in V} \frac{1}{k} z_k (1 - p_j) \delta[j \leq k] + \\ &\quad \frac{1}{j} \sum_{i \leq j, i \in V} (1 - p_j) z_i + \\ &\quad \sum_{k \in U \setminus j} \frac{1}{k} p_k (1 - p_j) \delta[j \leq k] + \\ &\quad \frac{1}{j} \left[ \sum_{i \leq j, i \in U \setminus j} (p_i + 1 - p_j p_i - p_j p_j) \right] \end{aligned}$$

Let's just look at the first pair of corresponding terms of  $E[\Delta]$ ,

$$(1 - p_j) \sum_{k \in V} \frac{1}{k} z_k (-p_j) \delta[j \leq k] + p_j \sum_{k \in V} \frac{1}{k} z_k (1 - p_j) \delta[j \leq k]$$

It is clear to see that the above summation equals 0. This is also true for the second and third terms,

$$(1-p_j)\frac{1}{j}\sum_{i\leq j, i\in V}(-p_j)z_i + p_j\frac{1}{j}\sum_{i\leq j, i\in V}(1-p_j)z_i$$

$$(1-p_j)\sum_{k\in U\setminus j}\frac{1}{k}p_k(-p_j)\delta[j\leq k] + p_j\sum_{k\in U\setminus j}\frac{1}{k}p_k(1-p_j)\delta[j\leq k]$$

Only the last pair of terms remains, and simplifies as:

$$\begin{aligned} E[\Delta] &= -\frac{1}{j}\sum_{i\leq j, i\in U\setminus j}p_j^3 - p_j + p_j^2(1-p_j) \\ &= -\frac{1}{j}\sum_{i\leq j, i\in U\setminus j}p_j^3 - p_j + p_j^2 - p_j^3 \\ &= -\frac{1}{j}\sum_{i\leq j, i\in U\setminus j}-p_j + p_j^2 \\ &= \frac{1}{j}\sum_{i\leq j, i\in U\setminus j}p_j(1-p_j) \end{aligned}$$

Let  $r_j$  be the proportion of unvetted examples scoring higher than example  $j$ :

$$\begin{aligned} r_j &= \frac{|\{i\in U : i\leq j\}|}{|\{i\in U\cup V : i\leq j\}|} \\ &= \frac{1}{j}\sum_{i<j}\delta(i\in U) \end{aligned}$$

Putting back in the constant scaling yields the expression given in the paper:

$$\begin{aligned} E[\Delta] &= \frac{1}{N_p}\frac{1}{j}\sum_{i\leq j, i\in U\setminus j}p_j(1-p_j) \\ &= \frac{1}{N_p}r_jp_j(1-p_j) \end{aligned}$$

The term is largest when  $p_j$  is 0.5 and decrease as it approaches 0 or 1. The term also decreases when there are many unvetted examples that score higher than  $j$  since they have relatively more impact on the AP.

## 2. Estimator for multilabel classification

Here we derive the basis for Equation 4 in the main paper.

$$\begin{aligned} p(z_i|y_i, s_i) &= \frac{p(z_i, y_i, s_i)}{\sum_{v\in\{0,1\}}p(z_i=v, y_i, s_i)} \\ &= \frac{p(y_i|z_i, s_i)p(z_i|s_i)}{\sum_{v\in\{0,1\}}p(y_i|z_i, s_i)p(z_i|s_i)} \end{aligned}$$

We assume that given the true label,  $z_i$ , the observed label  $y_i$  is conditionally independent of the classifier score,  $s_i$ . With  $p(y_i|z_i, s_i) = p(y_i|z_i)$ , the expression simplifies to,

$$p(z_i|y_i, s_i) = \frac{p(y_i|z_i)p(z_i|s_i)}{\sum_{v\in\{0,1\}}p(y_i|z_i)p(z_i|s_i)}$$

## 3. Additional Results

Figure 1 shows the results of estimating absolute precision@48 for the multilabel classification tasks on both NUS-WIDE and Microvideos datasets. In contrast, plots in the main paper show the total absolute error from the true value.

## References

- Boyd, S., Cortes, C., Mohri, M., and Radovanovic, A. Accuracy at the top. In *Advances in neural information processing systems*, 2012.
- Joachims, T. A support vector method for multivariate performance measures. In *Proceedings of the 22nd international conference on Machine learning*, pp. 377–384. ACM, 2005.
- Vapnik, V. Principles of risk minimization for learning theory. In *Advances in neural information processing systems*, pp. 831–838, 1992.

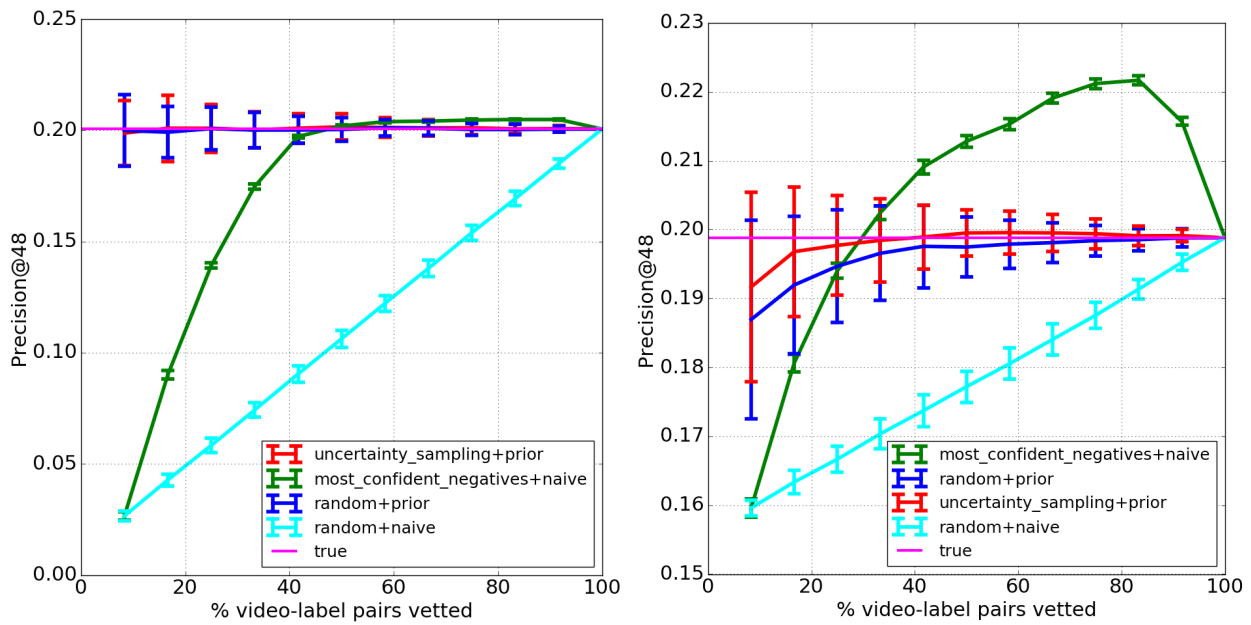

Figure 1. Results for multi-label classification task. The figures show the mean and standard deviation of the estimated Precision@K at different amount of annotation efforts. Using a fairly simple estimator and vetting strategy, the proposed framework can estimate the performance very closely to the true values.
